# Supplementary material
Source: PubMed Central journal article supplement (PMC6329664)
Supplement: NIHMS1510842-supplement-6.pdf [file NIHMS1510842-supplement-6.pdf]

| Condition     | Sex    | Age       | Diagnosis                                                                         | Treatment                                                                                                                                                                                                                                                                                                                                                                                                                  |
|---------------|--------|-----------|-----------------------------------------------------------------------------------|----------------------------------------------------------------------------------------------------------------------------------------------------------------------------------------------------------------------------------------------------------------------------------------------------------------------------------------------------------------------------------------------------------------------------|
| Control       | Male   | 10 months | Herpes Simplex Virus (HSV) hepatitis                                              |                                                                                                                                                                                                                                                                                                                                                                                                                            |
| Control       | Male   | 15 months | Waterhouse-Friderichsen syndrome                                                  |                                                                                                                                                                                                                                                                                                                                                                                                                            |
| Control       | Male   | 3 years   | Acute Respiratory Distress Syndrome (ARDS)                                        |                                                                                                                                                                                                                                                                                                                                                                                                                            |
| Control*      | Male   | 10 years  | Diffuse Intrinsic Pontine Glioma (DIPG)                                           | Focal radiation to brainstem (only 4 fractions of therapy completed, 7.2 Gy total) without chemotherapy                                                                                                                                                                                                                                                                                                                    |
| Control       | Male   | 25 years  | Familial dilated cardiomyopathy status-post heart transplantation; Ischemic event |                                                                                                                                                                                                                                                                                                                                                                                                                            |
|               |        |           |                                                                                   |                                                                                                                                                                                                                                                                                                                                                                                                                            |
| Chemotherapy  | Female | 6 months  | Medulloblastoma                                                                   | Chemotherapy (no radiotherapy)                                                                                                                                                                                                                                                                                                                                                                                             |
| Chemotherapy  | Male   | 3 years   | Metastatic Neuroblastoma                                                          | Chemotherapy (VP-16, carboplatin, cyclophosphamide)                                                                                                                                                                                                                                                                                                                                                                        |
| Chemotherapy  | Male   | 3 years   | Metastatic rhabdomyosarcoma                                                       | Chemotherapy (no radiotherapy)                                                                                                                                                                                                                                                                                                                                                                                             |
| Chemotherapy* | Male   | 3 years   | Medulloblastoma                                                                   | surgical resection of cerebellar lesion, no radiotherapy, and a chemotherapy regime including high-dose i.v. methotrexate (peak serum MTX measure at 82 uM), vincristine, cyclophosphamide, cisplatin, then at recurrence with intrathecal cytarabine, oral CCNU and etoposide (treated as per SJYC07, Robinson et al. 2018). Last MTX dose 3 months prior to death; last chemotherapy of any kind 1 month prior to death. |
| Chemotherapy  | Female | 26 years  | Acute myelocytic leukemia (AML)                                                   | Chemotherapy (no radiotherapy)                                                                                                                                                                                                                                                                                                                                                                                             |

**Table S1, Related to Figure 1:** Depletion of white matter oligodendroglial lineage cells in humans following early life chemotherapy treatment

Sex, age, diagnosis, and treatment upon death of human subjects for chemotherapy-exposed and age-matched controls. All tissue samples represent frontal cortex and subcortical white matter. \*denotes the cases illustrated in Figure 1D in which treatment with high-dose MTX was well-documented. The details of the chemotherapy regimens for many of the cases shown in Figure 1A-C are incomplete due to limitations in available medical records.
