# Supplementary material
Source: PubMed Central journal article supplement (PMC6329664)
Supplement: NIHMS1510842-supplement-7.pdf [file NIHMS1510842-supplement-7.pdf]

| Gene ID       | FWD                     | REV                       | Product Size |
|---------------|-------------------------|---------------------------|--------------|
| <i>Amigo2</i> | GAGGCGACCATAATGTCGTT    | GCATCCAACAGTCCGATTCT      | 263          |
| <i>Arg1</i>   | TTTTAGGGTTACGGCCGGTG    | CCTCGAGGCTGTCTTTTGA       | 146          |
| <i>Aspg</i>   | GCTGCTGGCCATTTACTG      | GTGGGCTGTGCATACTCTT       | 133          |
| <i>B3gnt5</i> | CGTGGGGCAATGAGAACTAT    | CCCAGCTGAACTGAAGAAGG      | 207          |
| <i>C1qa</i>   | CTGGCATCCGGACTGGTATC    | CTTTCACGCCCTTCAGTCCT      | 141          |
| <i>Ccl2</i>   | CACTCACCTGCTGCTACTCA    | GCTTGGTGACAAAACTACAGC     | 117          |
| <i>Ccl5</i>   | TCACCATATGGCTCGGACACC   | CTCTGGGTTGGCACACACTT      | 162          |
| <i>Ccr1</i>   | CATGAGCTCTCTGCTGGCTT    | TCCAGTTTCTGGAATGCCCC      | 253          |
| <i>Ccr5</i>   | CCTAGCCAGAGGAGGTGAGA    | TTGGCAGGGTGTGACATAC       | 127          |
| <i>Ccr6</i>   | AGCTTGGAGCAGAATAGCAAGAA | GGAGAGCAGAGGTGAAGCAATA    | 199          |
| <i>Ccr8</i>   | CTCAGAAGAAAGGCTCGCTCA   | GGGCGGTGAAGAAATCAGGG      | 107          |
| <i>Ccr9</i>   | GGAGGCTGGTCTGCATTATCTT  | GGTGCCCAATGAACACAAG       | 244          |
| <i>Cd109</i>  | TTTTTCTGCTGCAGCTCTGA    | GAGTGGACTGTCGCCATGA       | 169          |
| <i>Cd14</i>   | GGACTGATCTCAGCCCTCTG    | GCTTCAGCCCAGTGAAAGAC      | 232          |
| <i>Cd19</i>   | TCATTGCAAGGTCAGCAGTG    | CGGGGTCAGTCATTCGCTTC      | 168          |
| <i>Cd1d1</i>  | CCAGAGCCTTTGTGTACCAGT   | GTAGGAATGCCACAGCAAC       | 119          |
| <i>Cd22</i>   | GAGGAAACAGGCTTTCTGGGT   | GGAGCCACAGGTAATGGACG      | 291          |
| <i>Cd24a</i>  | GCGAGCTTAGCAGATCTCCAC   | CGGTGCAACAGATGTTTGGT      | 165          |
| <i>Cd27</i>   | ACAGCTGCTCAGTGTGATCC    | GCTTCTCTGTCCATGAGGT       | 283          |
| <i>Cd40lg</i> | CACACGTTGTAAGCGAAGCC    | ACCGTCAGCTGTTTCCCATT      | 118          |
| <i>Cd44</i>   | ACCTTGGCCACCACTCCTAA    | GCAGTAGGCTGAAGGGTTGT      | 299          |
| <i>Cd5</i>    | TCTGCAGTGTGGCTCTTTCTT   | TAGTGAGACACAGCTCCCGT      | 133          |
| <i>Cd80</i>   | GAAAAACCCCAAGAAGACCCT   | GCTAATGCTTCTTCAGGCC       | 197          |
| <i>Cd84</i>   | TGCTCTGCTCCGGAAACAC     | TTCATTACCACGGGTCTGC       | 174          |
| <i>Cd86</i>   | CTTACGGAAGCACCCACGAT    | TGTAAATGGGCACGGCAGAT      | 147          |
| <i>Clcf1</i>  | CTTCAATCCTCCTCGACTGG    | TACGTCGGAGTTCAGCTGTG      | 176          |
| <i>Cp</i>     | TGTGATGGGAATGGGCAATGA   | AGTGTATAGAGGATGTTCCAGGTCA | 282          |
| <i>Cr2</i>    | GCTCTTTGCAAATACCGGTCAA  | TGTCATCAGCTTGCTGGGTT      | 212          |
| <i>Ctla4</i>  | ATGGCTTGTCTTGGACTCCG    | CACCACTGAAGGTTGGGTCA      | 138          |
| <i>Cx3Cr1</i> | CCTGCAGAAGTTCCCTTCCC    | AACAGGCCTCAGCAGAATCG      | 106          |
| <i>Cxcl10</i> | CCCACGTGTTGAGATCATTG    | CACTGGGTAAAGGGGAGTGA      | 211          |
| <i>Emp1</i>   | GAGACACTGGCCAGAAAAGC    | TAAAAGGCAAGGGAATGCAC      | 183          |
| <i>Fbln5</i>  | CTTCAGATGCAAGCAACAA     | AGGCAGTGTGAGAGCCCTTA      | 281          |
| <i>Fkbp5</i>  | GTGGGTTCTACATCGGCACT    | GAGTCTGCGAAAGGACTTGG      | 223          |
| <i>Foxp3</i>  | GCCACTCCAGACAGAAGAAAG   | GGGTTGGGCATTGGGTTCTT      | 192          |
| <i>Fpr1</i>   | TGTCCAGAGCTGTTGGAAAGT   | CCAGAACGATGTAGCCAGCA      | 136          |
| <i>Gata3</i>  | TGGCGCCGTCTTGATAGTT     | CACCTGAGTAGCAAGGAGCG      | 174          |
| <i>Gbp2</i>   | GGGGTCACTGTCTGACCACT    | GGGAAACCTGGGATGAGATT      | 285          |
| <i>Gfap</i>   | AGAAAGGTTGAATCGCTGGA    | CGGCGATAGTCGTTAGCTTC      | 299          |
| <i>Ggta1</i>  | GTGAACAGCATGAGGGGTTT    | GTTTTGTTGCCTCTGGGTGT      | 115          |
| <i>H2-D1</i>  | TCCGAGATTGTAAAGCGTGAAGA | ACAGGGCAGTGCAGGGATAG      | 204          |
| <i>H2-T23</i> | GGACCGGAATGACATAGC      | GCACCTCAGGGTGACTTCAT      | 212          |
| <i>Hsbp1</i>  | GACATGAGCAGTCGGATTGA    | GGATGGGGTGTAGGGGTACT      | 265          |
| <i>Icos</i>   | GGCAGACATGAAGCCGTACT    | TGCTGGACAGTCTCAGGGTA      | 156          |

|                        |                         |                        |     |
|------------------------|-------------------------|------------------------|-----|
| <i>Ifng</i>            | AGACAATCAGGCCATCAGCA    | TGGACCTGTGGGTTGTTGAC   | 135 |
| <i>ligp1</i>           | GGGGCAATAGCTCATTGGTA    | ACCTCGAAGACATCCCCTTT   | 104 |
| <i>Il10ra</i>          | AGTCTTCAGTTCTCAGGACGC   | GCAATGAATTCTAGGCTCAGGC | 139 |
| <i>Il12rb1</i>         | AGTGTGTTTCTGAGCGTGGA    | CATGTCCATGAGGAGCCGAG   | 90  |
| <i>Il18r1</i>          | CAAGGAGAGGAACCCAC       | GGTGAATACAACTTTTGAGGCA | 146 |
| <i>Il1a</i>            | CGCTTGAGTCGGCAAAGAAAT   | CTTCCCGTTGCTTGACGTTG   | 271 |
| <i>Il2</i>             | GCCCCAAGGGCTCAAAAATG    | GCGCTTACTTTGTGCTGTCC   | 165 |
| <i>Il23a</i>           | TGGAGCAACTTCACACCTCC    | GGCAGCTATGGCCAAAAAGG   | 170 |
| <i>Il2ra</i>           | AAGTGTGGGAAAACGGGGTG    | GTGGGTTGTGGGAAGTCTGT   | 161 |
| <i>Il33</i>            | GGGCTCACTGCAGGAAAGT     | TATTTTGCAAGGCGGGACCA   | 161 |
| <i>Il4</i>             | ATGGATGTGCCAAACGTCTT    | GGCATCGAAAAGCCCGAAAG   | 175 |
| <i>Il5</i>             | CCATGAGCACAGTGGTGAAA    | TAGCATTCCACAGTACCCCC   | 188 |
| <i>Il6r</i>            | TGAATGATGACCCAGGCAC     | ACACCCATCCGCTCTCTACT   | 104 |
| <i>Il9r</i>            | CCATTGGAGTGAGTGAGGCC    | GTCCAACCTCTGGAAGTCCCC  | 255 |
| <i>Irf4</i>            | CTGCCAGCCCAGGTTCATAA    | AGGTGGGGCACAAGCATAAA   | 195 |
| <i>Klrd1 (CD94)</i>    | TTCCAGGAAGTTTCTGAATGCTG | CTGTGCCATCCTCCCATAGC   | 250 |
| <i>Lag3</i>            | CCCCTTCTTTGCTCATTGCC    | CCGGGGTTACCTCACACAAC   | 252 |
| <i>Lair1</i>           | GTTGCTGGAGCCTGAGTCAT    | TTCCATAAAGGTGCTGCCGT   | 234 |
| <i>Lcn2</i>            | CCAGTTCGCCATGGTATTTT    | CACACTCACCACCCATTGAG   | 206 |
| <i>Maf</i>             | AGGATGGCTTCAGAACTGGC    | GGTCTCCACCGTTCTTTTT    | 120 |
| <i>Mmp2</i>            | CGCGTAAAGTATGGGAACGC    | AAACAAGGCTTCATGGGGGC   | 177 |
| <i>Mmp9</i>            | CGCTCATGTACCCGCTGTAT    | CCGTGGGAGGTATAGTGGGA   | 180 |
| <i>Mrc1</i>            | GTCAGAACAGACTGCGTGGA    | AGGGATCGCTGTTTTCCAG    | 281 |
| <i>Nos2</i>            | ACAGGGAGAAAGCGCAAAAC    | TGTGGCCTTGTGGTGAAGAG   | 237 |
| <i>Osmr</i>            | GTGAAGGACCCAAAGCATGT    | GCCTAATACCTGGTGCGTGT   | 199 |
| <i>Pdcd1 (PD1)</i>     | AGGGAACCAGCAGAGCTAGA    | GAGAGCCAGAACCCAACTCC   | 193 |
| <i>Pdcd1lg2 (PDL2)</i> | TGCCGATACTGAACCTGAGC    | TTCAGTGCATTCTCTGCGGT   | 140 |
| <i>Ptger1</i>          | GTTTTGCCCACTCAAGGCTC    | ATATCAGTGGCCAAGAGGGC   | 232 |
| <i>Ptgs2</i>           | GCTGTACAAGCAGTGGCCAAA   | CCCCAAAGATAGCATCTGGA   | 232 |
| <i>Ptx3</i>            | AACAAGCTCTGTTGCCATT     | TCCCAAATGGAACATTGGAT   | 147 |
| <i>S100a10</i>         | CCTCTGGCTGTGGACAAAAT    | CTGCTCACAAGAAGCAGTGG   | 238 |
| <i>S1pr3</i>           | AAGCCTAGCGGGAGAGAAAC    | TCAGGGAACAATTGGGAGAG   | 197 |
| <i>Serpina3n</i>       | CCTGGAGGATGTCCTTTCAA    | TTATCAGGAAAGGCCGATTG   | 233 |
| <i>Serping1</i>        | ACAGCCCCCTCTGAATTCTT    | GGATGCTCTCCAAGTTGCTC   | 299 |
| <i>Slc10a6</i>         | GCTTCGGTGGTATGATGCTT    | CCACAGGCTTTTCTGGTGAT   | 217 |
| <i>Sphk1</i>           | GATGCATGAGGTGGTGAATG    | TGCTCGTACCCAGCATAGTG   | 135 |
| <i>Srgn</i>            | GCAAGGTTATCCTGCTCGGA    | TGGGAGGGCCGATGTTATTG   | 134 |
| <i>Stat4</i>           | GAACAGTTGGGGCGTGTTC     | AGGTCCCTGGATAGGCATGT   | 183 |
| <i>Stat6</i>           | AACGACAACAGCCTCAGTGT    | AGACAGCGTTTGGTGAGGTC   | 140 |
| <i>Steap4</i>          | CCCGAATCGTGCTTTTCTA     | GGCCTGAGTAATGGTTGCAT   | 262 |
| <i>Tgm1</i>            | CTGTTGGTCCCGTCCCAAA     | GGACCTTCATTGTGCCTGG    | 97  |
| <i>Tigit</i>           | TCCTGGTGGGATTTACAAGGG   | ATGAGAGACTCCTCAGGTTCCA | 236 |
| <i>Timp1</i>           | AGTGATTTCCCGCCAACTC     | GGGGCCATCATGGTATCTGC   | 123 |
| <i>Tm4sf1</i>          | GCCCAAGCATATTGTGGAGT    | AGGGTAGGATGTGGCACAAAG  | 258 |
| <i>Tnf</i>             | AGGCACTCCCCAAAAGATG     | CCACTTGGTGGTTTGTGAGTG  | 213 |
| <i>Tnfrsf18 (GITR)</i> | CCGAGTGTAGTTGAGGAGCC    | CAACACACCGGAAGCCAAAC   | 244 |

|                        |                      |                        |     |
|------------------------|----------------------|------------------------|-----|
| <i>Tnfrsf4 (OX40)</i>  | TATCTGGAAAGCAGACCCGC | CAGGCCTAGGAGAACAGCAA   | 218 |
| <i>Tnfrsf9 (4-1BB)</i> | GGAGCTAACGAAGCAGGGTT | TCTTAAATGCTGGTCCTCCCTC | 221 |
| <i>Tnfsf18 (GITRL)</i> | CACTCAAGCCAAGTCCATC  | ACAGGAATCACTTGGCCGTAG  | 166 |
| <i>Tnfsf4 (OX40L)</i>  | ATGGAAGGGGAAGGGGTTC  | TCACATCTGGTAACTGCTCCT  | 212 |
| <i>Ugt1a</i>           | CCTATGGGTCACTTGCCACT | AAAACCATGTTGGGCATGAT   | 136 |
| <i>Vtcn1 (B7H4)</i>    | GGCAAAGACGACCTCTCACA | CGTGAGCTGCACGTTTTTCA   | 114 |

**Table S2, Related to Figures 5 and 6:** Primer sequences for microglial and astrocytic qPCR
